# Supplementary material for: Population Pharmacokinetic/Pharmacodynamic Analysis of Intravenous Zanamivir in Healthy Adults and Hospitalized Adult and Pediatric Subjects With Influenza
Source: PubMed Central journal article supplement — Clin Transl Sci. 2019 Nov 7;13(1):157–68. doi: 10.1111/cts.12697 (PMC6951463; doi:10.1111/cts.12697), 2019-11-07
Supplement: CTS-13-157-s001.pdf [file CTS-13-157-s001.pdf]

**Figure S1: Change from Baseline of Viral Load (Quantitative Virus Culture) by Exposure Measures for Day 1 and Day 2**

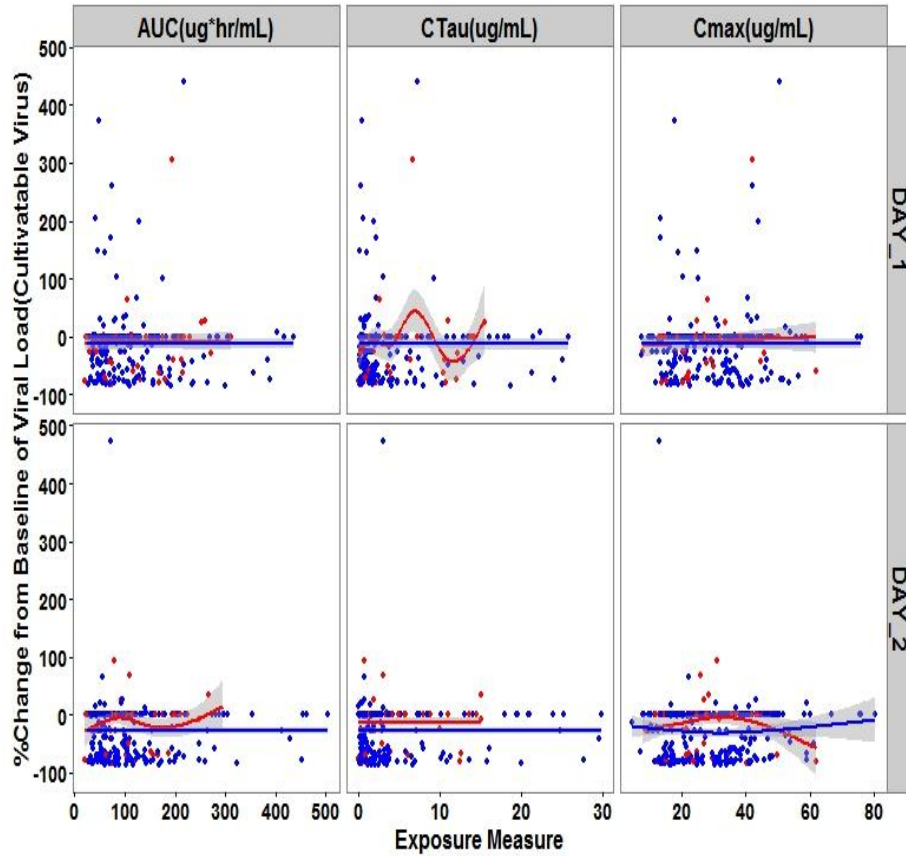

**Note:** In all these plots, blue dots are observations and blue line is local regression smoothing line (95% CI shaded region) for individuals who had symptom onset within 4 days before start of zanamivir treatment; red dots are observations and red line is local regression smoothing line (95% CI shaded region) for individuals who had symptom onset more than 4 days before start of zanamivir treatment; Time on x-axis is day relative to baseline measure. Quantitative virus culture was measured in TCID<sub>50</sub>/mL.
